# Supplementary material
Source: Springer Nature journal article supplement (https://www.springermedizin.de/resource/supplementary/13229_2013_109_MOESM3_ESM.pdf/9676188)

SVM probability for predicted class

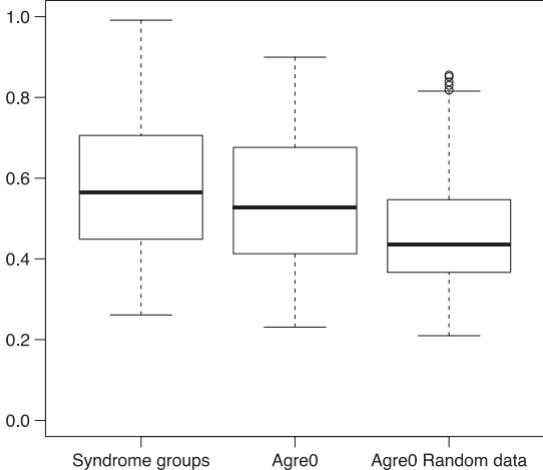

Supplement: MOESM3 [file 9676188]
